# Supplementary figures and images for: RNA-Seq-Based Molecular Classification Analyses in Colorectal Cancer and Synchronous Adenoma
Source: MDPI journal article supplement (doi:10.3390/cancers15194851), 2023-10-04

Oncoprint of CRC

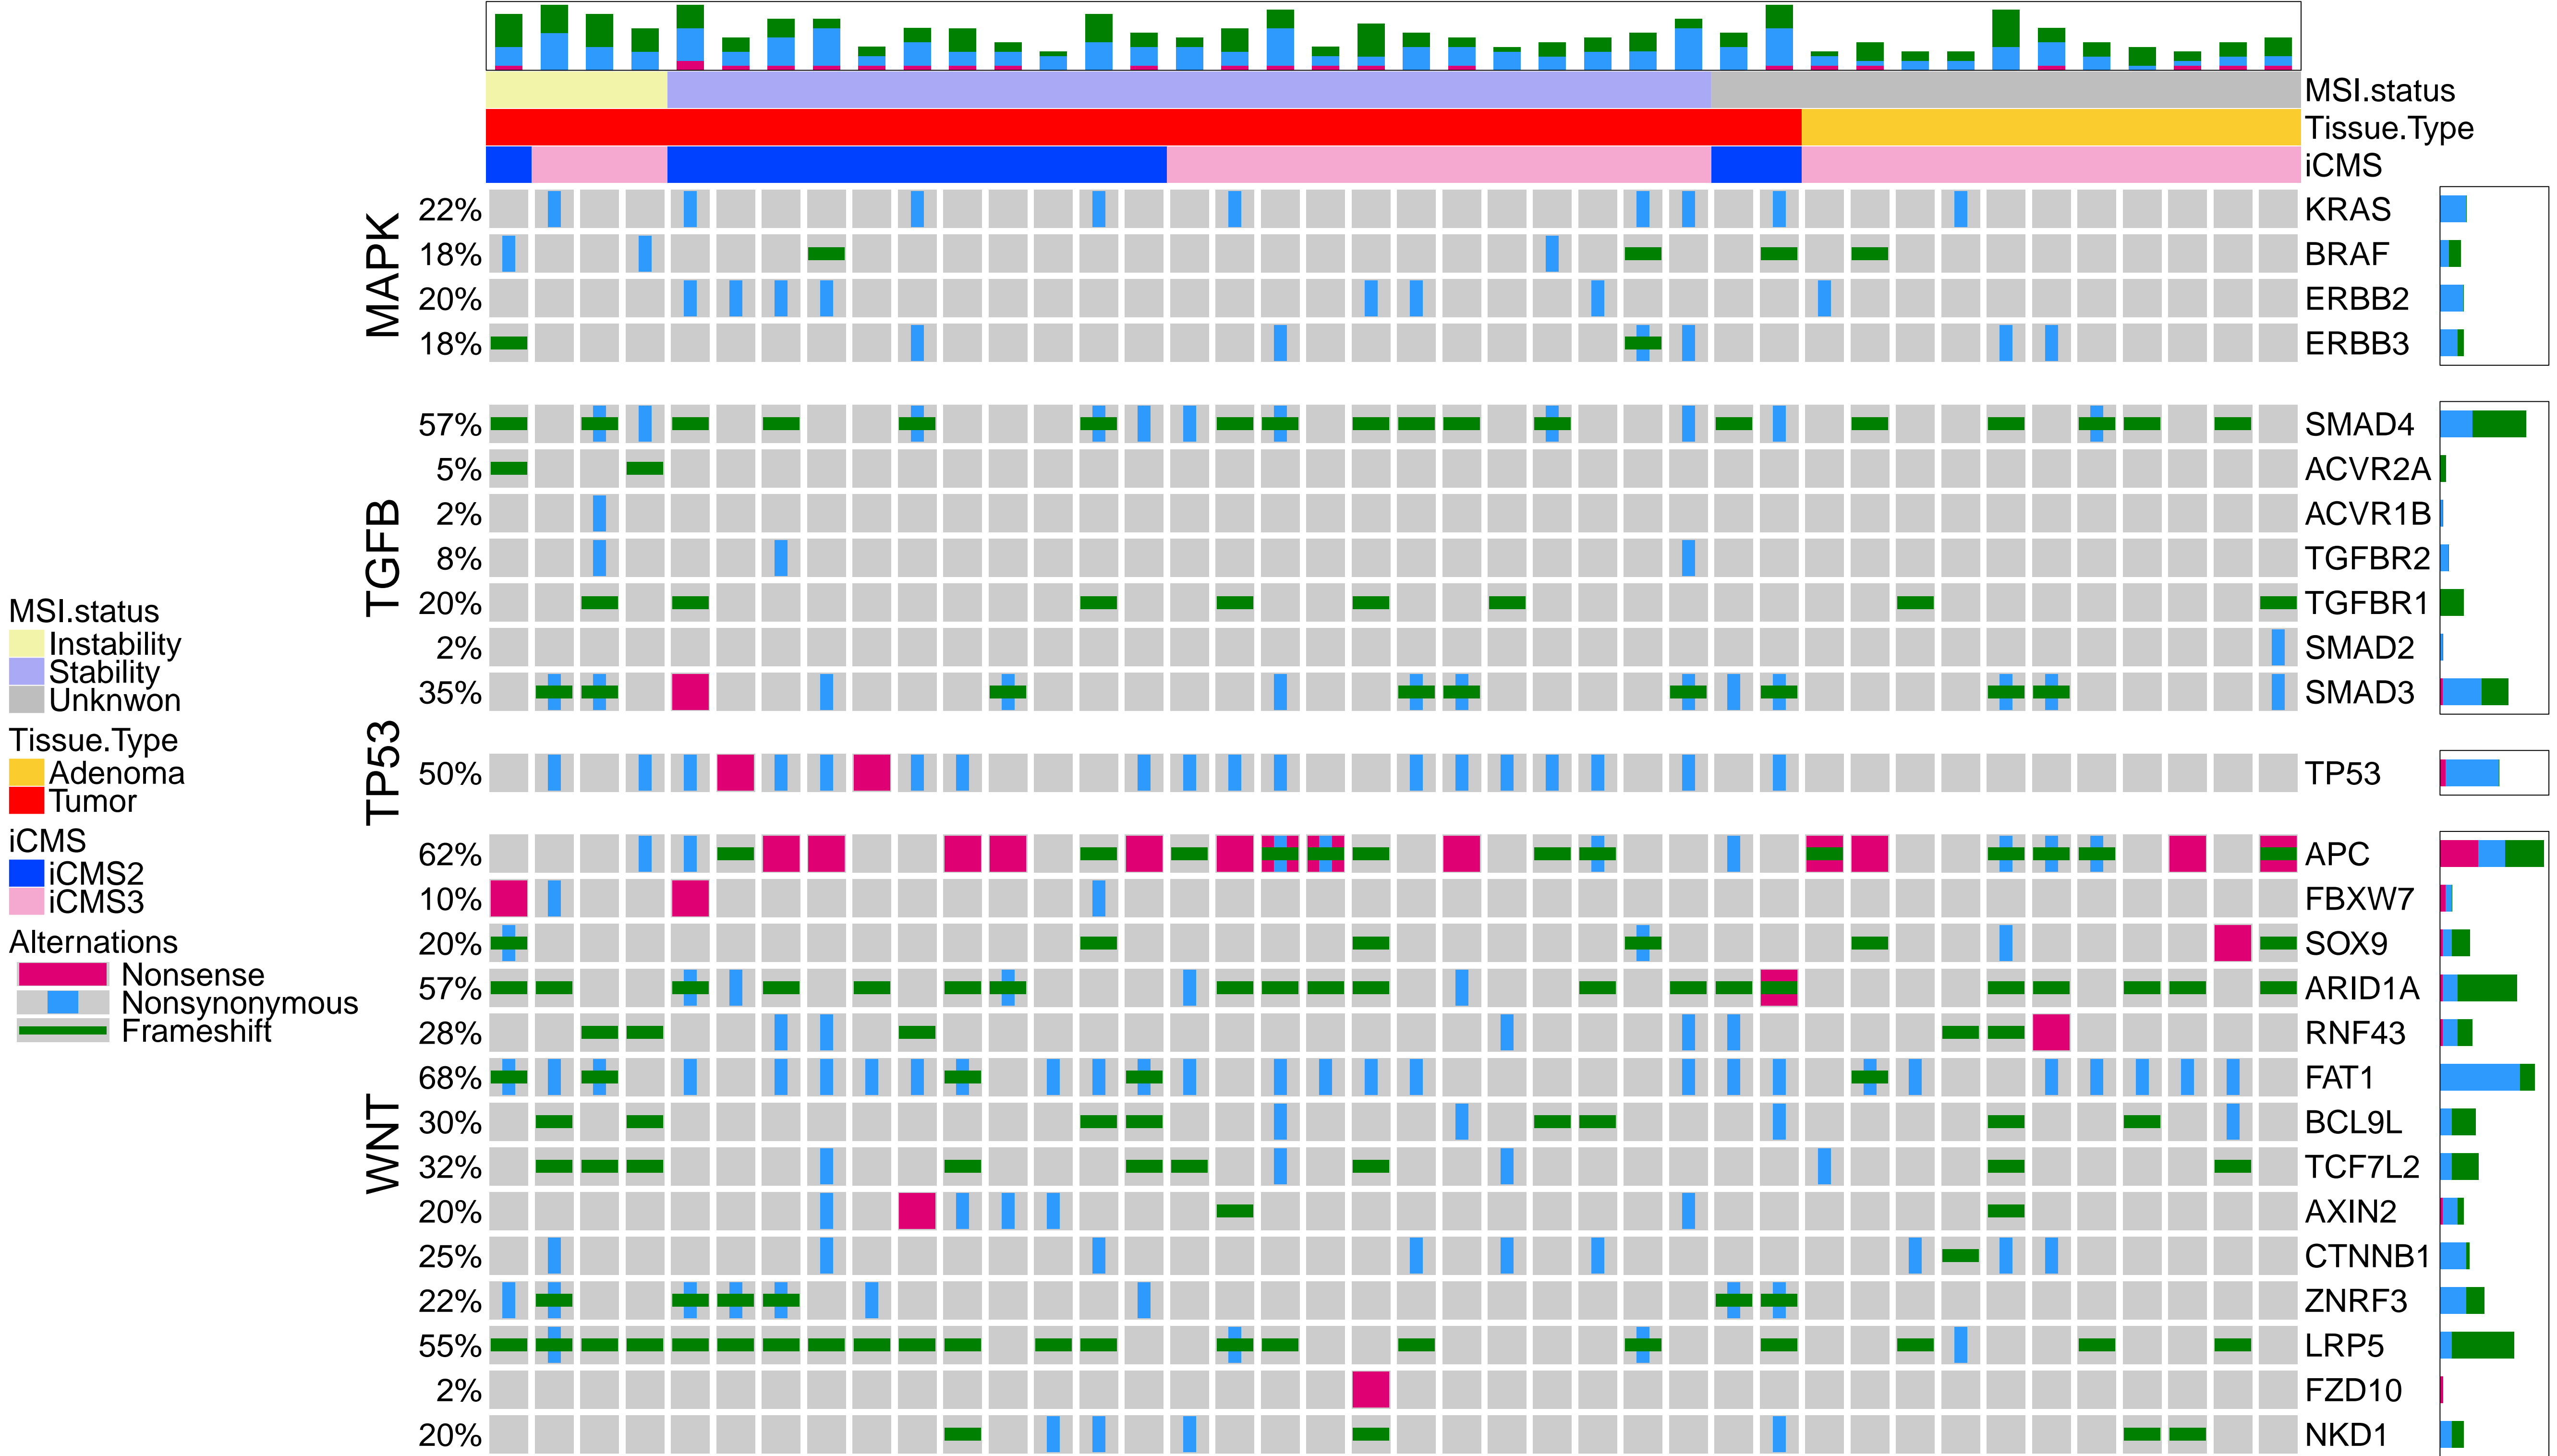

Supplement: s1 [file s1]
